# Supplementary material for: Transcatheter arterial embolization-salvaged ALPPS, a novel ALPPS procedure especially for patients with hepatocellular carcinoma and severe fibrosis/cirrhosis
Source: PubMed Central journal article supplement — Hepatobiliary Surg Nutr. 2022 Aug;11(4):504–14. doi: 10.21037/hbsn-21-466 (PMC9396088; doi:10.21037/hbsn-21-466), 2022-08
Supplement: hbsn-11-04-504-dss.pdf [file hbsn-11-04-504-dss.pdf]

## Data Sharing Statement

|                     |                                                                                                                                                     |                                                                                                                                                                                                                                               |
|---------------------|-----------------------------------------------------------------------------------------------------------------------------------------------------|-----------------------------------------------------------------------------------------------------------------------------------------------------------------------------------------------------------------------------------------------|
| <b>Article Info</b> | <a href="https://dx.doi.org/10.21037/hbsn-21-466">https://dx.doi.org/10.21037/hbsn-21-466</a>                                                       |                                                                                                                                                                                                                                               |
| <b>Item</b>         | <b>Question</b>                                                                                                                                     | <b>Authors' Response</b><br>(place "-" if not applicable)                                                                                                                                                                                     |
| 1                   | Would you like to share data collected for your study to others?                                                                                    | Yes                                                                                                                                                                                                                                           |
| 2                   | If not, would you like to share the reason for your decision?                                                                                       | -                                                                                                                                                                                                                                             |
| 3                   | What data in particular will be shared?                                                                                                             | The treatment efficacy of the TAE-Salvaged ALPPS (the R0 resection rate and hypertrophy of FLR), and treatment safety (the morbidity and 90-day mortality rates). Changes in liver parameters and other short-term outcomes were also shared. |
| 4                   | Any other documents will be shared? Such as study protocol, statistical analysis plan, informed consent form, clinical study report, analytic code. | The study protocol, statistical analysis plan, informed consent form, clinical study report will also be shared if requested.                                                                                                                 |
| 5                   | When will data availability begin?                                                                                                                  | From the publication date.                                                                                                                                                                                                                    |
| 6                   | When will data availability end?                                                                                                                    | Two years within the publication date, since the technique or survival data may be updated over time.                                                                                                                                         |
| 7                   | To whom will you share the data?                                                                                                                    | Hepatobiliary surgeons who are interested in studies of ALPPS.                                                                                                                                                                                |
| 8                   | For what type of analysis or purpose?                                                                                                               | For analysis to evaluate the safety and efficacy of TAE-Salvaged ALPPS in liver cancer patients.                                                                                                                                              |
| 9                   | How or where can the data/documents be obtained?                                                                                                    | Emails could be sent to the address below to obtain the shared data:<br>zhou.jian@zs-hospital.sh.cn                                                                                                                                           |
| 10                  | Any other restrictions?                                                                                                                             | We may balance the potential benefits and risks for each request and then provide the data that could be shared.                                                                                                                              |
